# Supplementary material for: A Thermolabile Phospholipase B from Talaromyces marneffei GD-0079: Biochemical Characterization and Structure Dynamics Study
Source: MDPI journal article supplement (doi:10.3390/biom10020231), 2020-02-04
Supplement: s1 [file s1]

Supplementary

## A Thermolabile Phospholipase B from *Talaromyces marneffei* GD-0079: Biochemical characterization and Structure dynamics study

Rabia Durrani<sup>1</sup>, Faez Iqbal Khan<sup>2\*</sup>, Shahid Ali<sup>3</sup>, Yonghua Wang<sup>3</sup> and Bo Yang<sup>1\*</sup>

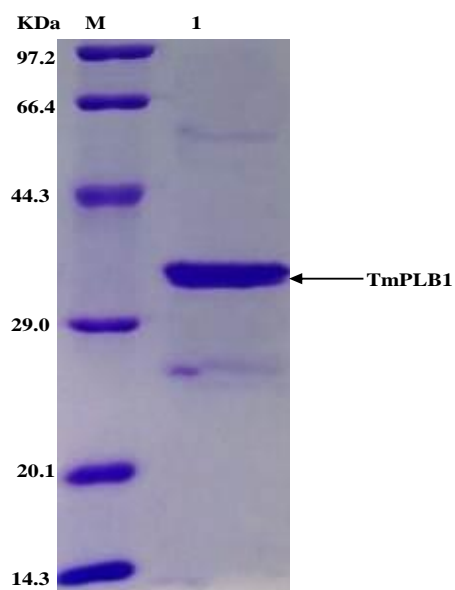

**Fig S1.** Purification of phospholipase B TmPLB1 by nickel-chelate chromatography and eluted with washing buffer 50 mM phosphate buffer (PB), (pH 7.4) that contained 500 mM imidazole. **KDa** (molecular weight of the protein marker in kilo daltons). **Lane M** (molecular weight of marker). **Lane 1.** Purified TmPlb1.

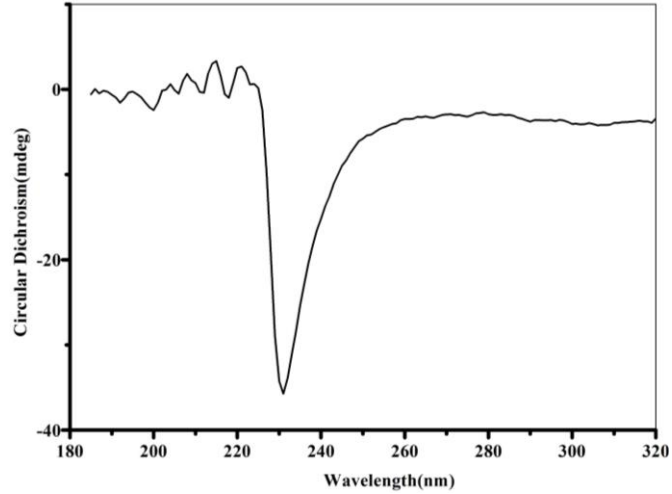

**Fig S2.** Far-UV CD spectra of TmPLB1. The protein was incubated at 25°C in 20 mM sodium phosphate buffer (pH 7.4) at a concentration of 0.5 mg/mL. Unfolding was followed by monitoring the CD signal at 222 nm.

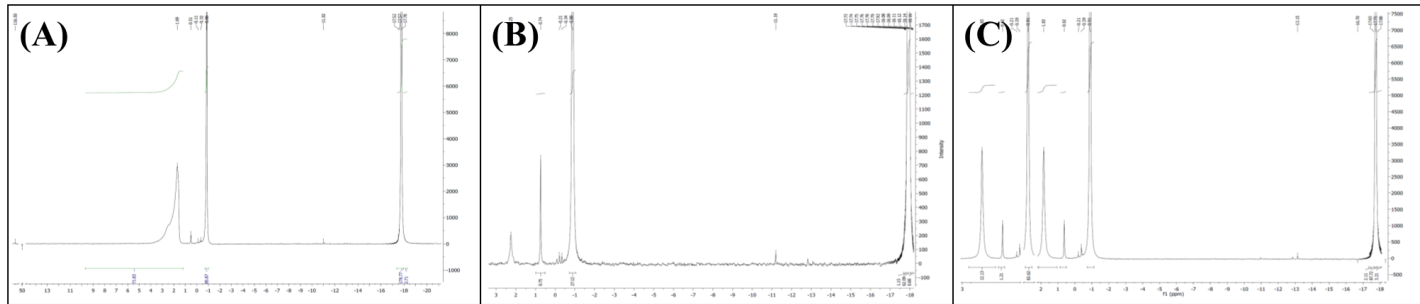

**Fig. S3.** Rapid Identification and classification of phospholipids in <sup>31</sup>P NMR by enzymatic reaction mechanism of TmPLB1 at three different time intervals (A) 24hr, (B) 48hr, and (C) 72hr with internal standard Triphenyl Phosphate (TPP).

**Table S1.** Overview of TmPLB1 purification.

| Purification Step       | Total Activity (U) | Total Protein (mg) | Specific Activity (U/mg) | Yield (%) | Fold |
|-------------------------|--------------------|--------------------|--------------------------|-----------|------|
| Lysate                  | 1775               | 95                 | 18.6                     | 100       | 1    |
| Affinity Chromatography | 240                | 4.96               | 48                       | 13.5      | 2.58 |
